# Singleton Variants Dominate the Genetic Architecture of Human Gene Expression

**Authors:** Ryan D. Hernandez<sup>1,2,3,4,\*</sup>, Lawrence H. Uricchio<sup>5</sup>, Kevin Hartman<sup>6</sup>, Chun Ye<sup>2,7</sup>, Andrew Dahl<sup>2,3</sup>, Noah Zaitlen<sup>2,3,8,\*</sup>

## Affiliations:

- 1) Bioengineering & Therapeutic Sciences, UCSF, San Francisco, CA;
- 2) Institute for Human Genetics, UCSF, San Francisco, CA;
- 3) Institute for Quantitative Biosciences, UCSF, San Francisco, CA;
- 4) Institute for Computational Health Sciences, UCSF, San Francisco, CA;
- 5) Department of Biology, Stanford University, Stanford, CA;
- 6) Biological and Medical Informatics Graduate Program, UCSF, San Francisco, CA;
- 7) Epidemiology & Biostatistics, UCSF, San Francisco, CA;
- 8) Department of Medicine Lung Biology Center, UCSF, San Francisco, CA.

\*Correspondence To:

Ryan D. Hernandez [Ryan.Hernandez@ucsf.edu](mailto:Ryan.Hernandez@ucsf.edu),

Noah Zaitlen [Noah.Zaitlen@ucsf.edu](mailto:Noah.Zaitlen@ucsf.edu)

## ABSTRACT

The vast majority of human mutations have minor allele frequencies (MAF) under 1%, with the plurality observed only once (i.e., “singletons”). While Mendelian diseases are predominantly caused by rare alleles, their role in complex phenotypes remains largely unknown. We develop and rigorously validate an approach to jointly estimate the contribution of alleles with different frequencies, including singletons, to phenotypic variation. We apply our approach to transcriptional regulation, an intermediate between genetic variation and complex disease. Using whole genome DNA and RNA sequencing data from 360 European individuals, we find that singletons alone contribute ~23% of all *cis*-heritability across genes (dwarfing the contributions of other frequencies). We then integrate external estimates of global MAF from worldwide samples to improve our inference, and find that average *cis*-heritability is 15.3%. Strikingly, 50.9% of *cis*-heritability is contributed by globally rare variants (MAF<0.1%), implicating purifying selection as a pervasive force shaping the regulatory architecture of most human genes.

**One Sentence Summary:** The vast majority of variants so far discovered in humans are rare, and together they have a substantial impact on gene regulation.

## INTRODUCTION

The recent explosive growth of human populations has produced an abundance of genetic variants with minor allele frequencies (MAF) less than 1% (1). While many rare variants underlying Mendelian diseases have been found (2), their role in complex disease remains unknown (3–8). Evolutionary models predict that the contribution of rare variants depends highly on selection strength (9, 10), and that population growth can magnify their impact (10, 11). Recent methodological breakthroughs (12, 13) have enabled researchers to jointly estimate the independent contributions of low and high frequency alleles to complex traits, often demonstrating a large rare variant contribution likely driven by natural selection (5, 14–17). However, these studies excluded the rarest variants (14) or included only well-imputed variants (5). Directly querying the role of all variants with large-scale sequencing and sensitive statistical tests has the potential to reveal important sources of missing heritability, direct genetic research efforts, and clarify how natural selection has shaped human phenotypes.

In this work, we develop, validate, and apply an approach for inferring the relative phenotypic contributions of all variants, from singletons to high frequency. We focus on the narrow-sense heritability ( $h^2$ ) of gene expression because a growing body of literature suggests that genetic variants primarily affect disease by modifying gene regulatory programs (18–20), and recent examinations have identified significant rare variant effects on transcription (8). To characterize the genetic architecture of gene expression, we analyze 360 unrelated individuals of European ancestry with paired whole genome DNA (21) and RNA (22) sequencing of lymphoblastoid cell lines (LCLs). We evaluate the robustness of our approach to genotyping errors, read mapping errors, population structure, rare variant stratification, and a wide range of possible genetic architectures (23).

## RESULTS

Before analyzing data, we performed a rigorous series of simulations to identify an approach for estimating heritability that is robust to possible confounding factors. In our simulations, we use real genotype data (all variants within 1 megabase of the transcription start or end sites of genes) and generate gene expression phenotypes across individuals while varying the number of causal variants contributing to the phenotype (from 1 to 1,000), the distribution of effect sizes (including uniform, frequency-dependent, and an evolutionary-based model), and the distribution of causal allele frequencies [ranging from predominantly rare to predominantly common (10, 23)]. In total, we simulated 440 different genotype-phenotype models that span beyond the range of genetic architectures that could plausibly underlie complex phenotypes such as gene expression, and analyzed each simulated dataset multiple ways. A common approach for estimating heritability in unrelated samples is to fit a linear mixed model (LMM) via restricted maximum likelihood [REML (24, 25)]. However, Haseman-Elston (H-E) regression [an alternative approach based on regressing phenotypic covariance on genotypic covariance (24)] is more robust in small samples (23).

Similar to previous work (26), we found that for many simulation settings, jointly analyzing all variants together can result in a substantial over- or underestimate of heritability (Fig 1A, which shows results when true heritability is 0.2). One common solution is to partition sites by frequency (5, 14, 27). Simply isolating rare (MAF $\leq$ 1%) from common variants using two partitions and performing joint inference (14) can improve the accuracy for most models. However, when there are many causal rare variants, the estimator remains upwardly biased. Partitioning alleles into five or more categories by

MAF (5) alleviates this problem. Remarkably, not only does the overall heritability bias decrease as the number of allele frequency categories increases, but Fig 1B-F shows that the bias of the heritability for each MAF bin also decreases substantially across all models (23). These simulations suggest that with our sample size, partitioning SNPs into 20 MAF bins results in the smallest bias in our estimate of total heritability as well as the smallest bias for each bin across all simulated parameters.

One possible confounding factor is the effect of genotyping error on heritability estimation (28). If heritability is biased by genotyping error, and genotyping error also varies as a function of MAF, there could be differential bias across bins when analyzing real data. We considered a range of genotyping error models, and found that all investigated forms of genotyping error eroded efficiency of heritability estimation, but did not induce a detectable upward bias (23).

When partitioning variants into multiple MAF bins, singletons are quickly isolated into their own category. Intuitively, if some fraction of singletons is causal, then individuals with higher singleton load may be more likely to be phenotypic outliers. It is therefore reasonable to ask what contribution singletons make to patterning phenotypic variation across a population. We therefore investigated the theoretical properties of heritability estimation from singleton variants, and show analytically that when genotypic covariance is estimated using singletons alone, H-E regression is equivalent to regressing squared phenotypes against singleton counts (23).

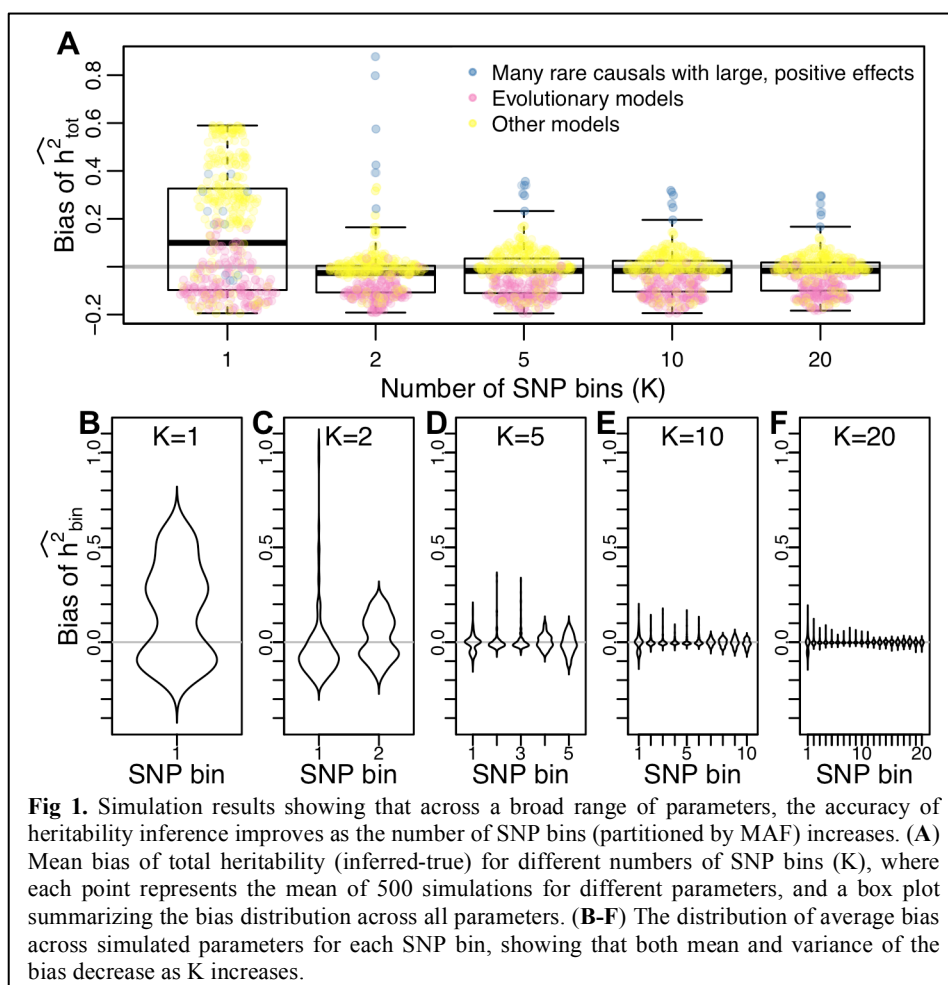

A direct implication of our derivation is that H-E regression is unbiased unless singletons have large non-zero mean effect sizes (violating an explicit assumption of both H-E regression and LMMs). Interestingly, these are precisely the simulation scenarios in Figure 1A where heritability estimates remain upwardly biased (blue points). We develop an alternative approach that produces unbiased estimates of both heritability and mean effect size in all examined cases (23), but because H-E regression is well understood and flexible, we recommend its use when mean effect sizes are near zero.

In order to characterize the genetic architecture of human gene regulation, we partitioned the heritability of gene expression by frequency. We used  $n=360$  unrelated individuals of European descent with RNA sequencing data from GEUVADIS (22) and whole genome sequencing data from 1000 Genomes Project [TGP (21)]. After extensive quality control to remove genes not expressed in LCLs, our data set includes 10,203 autosomal genes (23). For each gene, we extracted all variants within 1Mb of the transcription start or end sites; we do not consider *trans*-effects because of the small sample size. To control for non-normality, population structure, and batch effects, we quantile normalize expression values and include the first 10 principle components from both the genetic and phenotypic data in all analyses (23). We estimate heritability using H-E regression because we estimate a mean singleton effect size that is statistically indistinguishable from zero (23). We focus on 20 MAF bins because this was the most robust approach across simulated scenarios [see Fig 1 and discussion in (23)], and present average heritability across genes to characterize the genetic architecture of human gene regulation.

Early studies of heritability filtered out SNPs with  $MAF < 5\%$  prior to their analysis (29), and more recent studies only remove the rarest variants (5, 14). We show that the process of removing any SNPs based on MAF has a direct impact on the estimate of heritability. In Fig 2A, we show the total heritability inferred for different minor allele count (MAC) thresholds (averaged over all genes). We find that by adding progressively rarer variants to the analysis, there is a monotonic increase in the inferred heritability. Indeed, including all variants down to singletons nearly doubles the total heritability inferred ( $\widehat{h^2}_{total} = 0.089$ ) compared to the case when only common variants ( $MAF \geq 5\%$ ) are analyzed ( $\widehat{h^2}_{common} = 0.045$ ). Most of the increased heritability derives from singletons, which alone contribute  $\sim 23\%$ , dwarfing the contribution of all other frequency bins (Fig 2B).

However, not all singletons contribute equally to heritability, and finding the source of large-effect rare variants is of utmost importance (8). Evolutionary modeling suggests that rare variants will only contribute a substantial amount to heritability when causal alleles are deleterious (9, 10, 30, 31). Under such models, natural selection should restrain the frequency of large-effect alleles. We therefore hypothesized that the singletons that were contributing most to heritability would also be rare in much larger multi-ethnic cohorts, i.e. globally rare. We tested this hypothesis by partitioning our singletons into 20 bins based on their global allele frequencies observed across the entire worldwide sample of 2504 individuals in TGP, and using H-E regression to jointly infer the heritability contributed by each class of singletons. Strikingly, 90% of all singleton heritability is contribut-

ed by those alleles that are actually singletons across all 2504 samples in TGP (MAF<0.02%; Fig 2C). Pushing this result further, we partitioned our singletons based on the global frequency observed in >15,000 individuals in the gnomAD data set (32). We found that 31% of our singletons were not reported in gnomAD, despite the fact that all TGP samples are included in gnomAD. While this could indicate that a large fraction of our singletons are false positives, recent studies have suggested that modern SNP calling algorithms are risk-averse, and have resulted in rare variants suffering from a pervasive problem of false negatives (33, 34). Consistent with this possibility, we find that nearly 67% of our single-

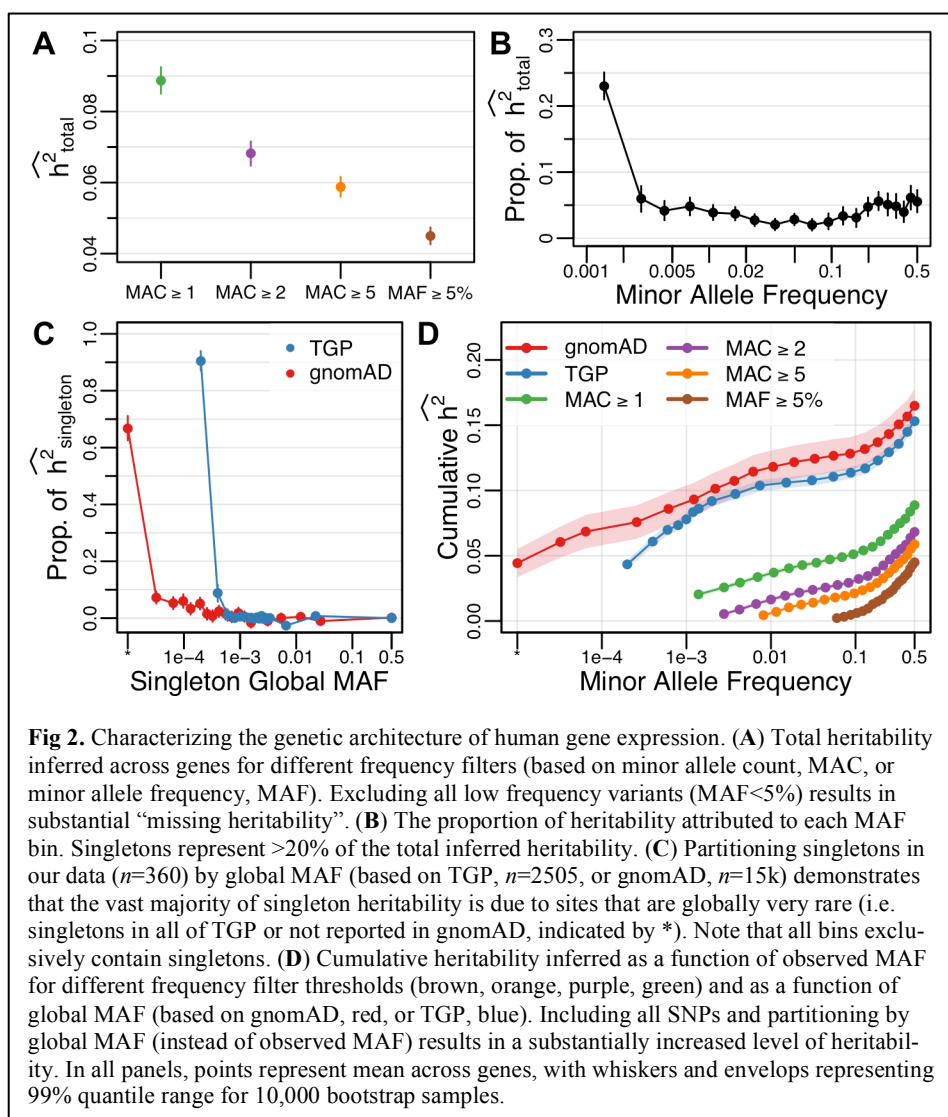

ton heritability derives from variants that were not called in gnomAD (indicated by \* in Fig 2C), and 85% of singleton heritability is contributed by alleles with global MAF<0.02%. Previous work has shown that additionally partitioning common variants by LD resulted in minimal change after partitioning by MAF (5).

Figure 2D shows how heritability accumulates as a function of MAF for different filtering schemes (with coloring as in Fig 2A) as well as when we partition all alleles by global MAF (based on either all of TGP or gnomAD). Surprisingly, partitioning variants by global MAF nearly doubles the inferred total heritability compared to cohort MAF ( $\widehat{h^2}_{total} = 0.165$  and  $0.153$  for gnomAD and TGP, respectively, versus  $\widehat{h^2}_{total} = 0.089$  for GEUVADIS), and that a majority of heritability (52.1% and 50.9% for gnomAD and TGP, respectively) is due to globally rare variants (MAF<0.1%). We show analytically and with simulations that these results are consistent with a “singleton-LD” effect (23), which previously has only been reported for common variants (5, 26).

To investigate the ability of rare variants to capture heritability of common variants (and vice-versa), we refit H-E regression removing MAF bins from rarest to most common (and vice-versa). We found that while rare variants could capture some of the heritability of more common variants, common variants could not capture the

heritability derived from singleton variants (23). This suggests that rare variants have not been indirectly captured in any published heritability estimates through “synthetic association” tagging (35).

We performed several analyses to examine possible confounding effects in these data. First, we ranked singletons by their reported genotype likelihood as reported for the individual carrying the singleton allele in TGP (21), and partitioned them into four equal groups (quartiles). We then ran H-E regression with these four groups of singletons (along with 10 PCs). Strikingly, we find that only those singletons with high SNP quality contribute positively to our inference of heritability (23). Second, since both the DNA and RNA sequencing is based on lymphoblastoid cell lines, it is conceivable that difficult to sequence regions of the genome could result in correlated errors that confound our inference. To test this, we restricted our analysis to regions of the genome passing the TGP Strict Mask (21), and found that our inference of heritability was unchanged. We further ranked genes based on the number of exon bases passing the strict mask, and found no difference in the genetic architecture of genes having high versus low overlap with the Strict Mask (23).

We find that rare variants are a major source of heritability of gene expression patterns, which we hypothesized was due rampant purifying selection acting to restrain the frequencies of large-effect alleles. To test this hypothesis, we performed extensive simulations of human evolutionary history (36, 37), and developed a novel model to infer the parameters of an evolutionary model for complex traits (23). Our three-parameter phenotype model was previously described (10), and captures the pleiotropy of causal variation (through  $\rho$ ), the scaling relationship between effect sizes and selection coefficients (through  $\tau$ ), and the overall strength of selection (which we capture with  $\phi$ , a mixture parameter between strong and weak selection distributions, where  $\phi=1$  corresponds to strong selection). We inferred approximate posterior distributions for each of these parameters by rejection sampling (38), which compares a set of informative summary statistics from genetic data simulated under a model of European demography (39) and selection (40, 41) to the observed data (23). Note that

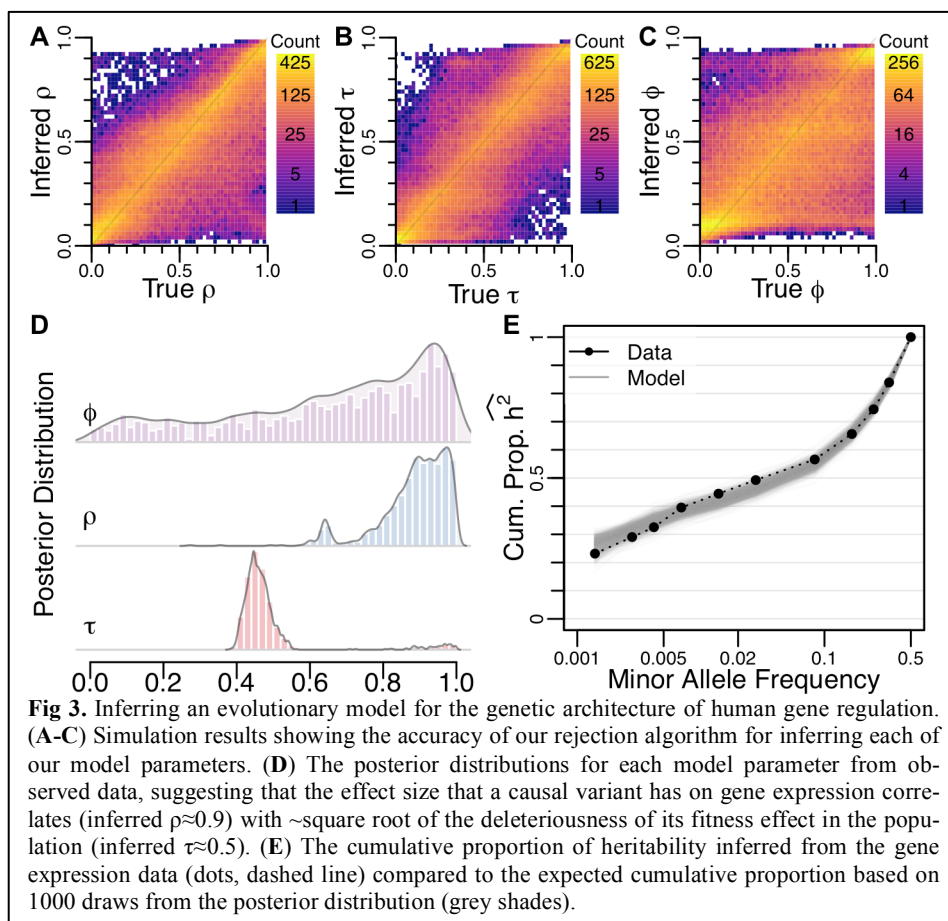

our inference procedure allows each parameter to vary across genes, but we only seek to infer the mean of  $\rho$ ,  $\tau$ , and  $\phi$  across genes. We rigorously evaluated the performance of this inference procedure with simulations, and found that we can infer  $\rho$  and  $\tau$  with fairly high accuracy, but  $\phi$  (while broadly unbiased) is less informative (Fig. 3A-C).

Applying this model to our data, we find that natural selection has had a major impact on the genetic architecture of human gene expression. In Figure 3D, we plot the posterior distributions of the mean values of  $\rho$ ,  $\tau$ , and  $\phi$ , which suggest that the effect size of causal variants is highly correlated ( $\hat{\rho} \approx 0.9$ ) with the square root of their selection coefficients ( $\hat{\tau} \approx 0.5$ ), implying that larger causal effects tend to be more deleterious (30, 42). Moreover, while a wide range of mixture coefficients ( $\phi$ ) are consistent with our observed data, much more probability mass is centered in the strong selection regime, suggesting that the selective pressure acting on most causal variants is likely to be just as strong as selection acting on nonsynonymous variants in coding regions. Consistent with this prediction, sites with increased evolutionary constraint exhibit higher heritability estimates (23).

## DISCUSSION

There is substantial interest in characterizing the genetic basis for complex traits to improve our understanding of human health and disease, and substantial resources are being spent to collect ever-larger cohorts to investigate the role of rare variants. In this study, we take a different approach. We developed, tested, and applied a novel technique for interrogating the role of rare variants in gene regulation using a relatively small cohort of  $n=360$  individuals who had whole genome DNA and RNA sequencing performed on their derived lymphoblastoid cell lines. We estimate that the total narrow sense heritability of LCL gene expression is 15-16%, and that an average of nearly a quarter of all heritability of gene expression can be explained by the rarest of variants in our data: singletons, where just one copy of the allele has been observed in our sample of 720 chromosomes (MAF=0.0014). Globally rare variants (global MAF<1%) explain 68-78% of this heritability. Our estimate of total *cis*-heritability is larger than the previous estimates of  $h_{cis}^2=0.057$  and  $h_{cis}^2=0.055$  in blood and adipose respectively (43), but lower than recent twin-based estimates of overall narrow-sense heritability  $h^2=0.26$ , 0.21, and 0.16 in adipose, LCLs, and skin respectively (44) as well overall broad-sense heritability  $H^2=0.38$  and 0.32 for LCLs and whole blood (45). It is therefore possible that rare variants account for substantial “missing heritability” in human gene expression, but differences in population, tissue, and/or technology could also explain some of these patterns.

While it might at first seem logical to genotype some (or all) of these singletons in a larger panel of individuals to statistically identify the causal ones, our analysis uncovered a major challenge with this approach: our results can only be explained if the causal alleles driving heritability are evolutionarily deleterious, with effect sizes scaling with the square root of the strength of selection acting on them. This means that the alleles that have the

greatest impact on gene expression are likely to be extremely rare in the broader population, and may be unlikely to exist in more than a few unrelated individuals across the world. This is consistent with a recent finding that a large fraction of individuals with outlier expression for a gene also tend to have a globally rare variant in the vicinity (8). We push this result further to quantify the overall impact that rare variants have on gene expression across a population. Indeed, we find that globally rare variants are the predominant source of heritability for gene expression. Our analysis shows that 85-90% of the singleton heritability derives from alleles that are not carried by any of the other 2504 individuals in TGP (and are either not reported or have  $MAF < 0.02\%$  in the  $n > 15,000$  samples in gnomAD). We therefore conclude that identifying causal variation for transcriptional variation will likely require the incorporation of new biological information, possibly including large-scale experimental testing of singleton variants to improve functional predictions.

Our results suggest that one cannot capture the heritability of rare or low frequency alleles by analyzing additional common alleles. This implies that “synthetic associations” (35, 46) are uncommon for gene expression data. A broader consequence is that, when rare variants matter, approaches that rely on genotyping large samples followed by imputing missing genotypes from reference populations may not successfully reconstruct the true impact of rare variants (especially when the reference panel is smaller than the test sample). This is because both genotyping and imputation require the variant to be present at a reasonable frequency in the reference population, which is highly unlikely for strongly deleterious alleles (indeed, we found that 67% of our singleton heritability was attributable to variants not reported in gnomAD). Instead, whole genome sequencing of large cohorts may be necessary (though the actual sample size required will depend on several factors that have not yet been elucidated).

As the number of samples with detailed phenotype data and whole genome sequencing data increases, it will be possible to apply the approach we have developed here to characterize the genetic architecture of additional complex traits. By integrating such methods with functional genomic data, we may also learn more about the biology of causal variants, which could enable improved identification of clinically actionable variants in some cases. However, it is not clear that the hope of *a priori* risk prediction from genomic data for a most diseases will be feasible for an otherwise healthy individual with limited family history information. Population genetic theory tells us that rare variants will only be a significant source of heritability when causal alleles are evolutionarily deleterious. But the biology of human health and disease is complex. While not all human diseases will themselves impart a strong fitness effect, extensive pleiotropy resulting from tightly interconnected networks of interacting proteins experiencing cell-specific regulatory mechanisms could. Indeed, under the omnigenic model of disease, variants that affect any one of these components could contribute to an individual’s risk for any disease involving any downstream pathway (47).

We developed an approach to examine the heritability of singleton variants, and the results have important implications for future genetic studies. We rigorously evaluated the performance of our inference procedure using extensive simulations and multiple types of permutations (23). While we employed several approaches to test for the presence of confounders from population structure, genotyping/mapping error, and cell line artifacts, there may be other unknown confounders that have biased the results of this study (23). We conservatively used quantile normalization on the expression phenotypes to enforce normality, and this often reduces the overall heritability estimates (23) by diminishing the impact of outliers (8). There are several other contributors to broad sense heritability that we have not attempted to model and may also account for some of the heritability estimated in family-based studies, such as gene-gene interactions, gene-environment interactions, and other non-additive components.

## References and Notes:

1. A. Keinan, A. G. Clark, Recent explosive human population growth has resulted in an excess of rare genetic variants. *Science*. **336**, 740–743 (2012).
2. M. J. Bamshad *et al.*, Exome sequencing as a tool for Mendelian disease gene discovery. *Nat Rev Genet*. **12**, 745–755 (2011).
3. J. Zhao *et al.*, A Burden of Rare Variants Associated with Extremes of Gene Expression in Human Peripheral Blood. *Am J Hum Genet*. **98**, 299–309 (2016).
4. S. B. Montgomery, T. Lappalainen, M. Gutierrez-Arcelus, E. T. Dermitzakis, Rare and common regulatory variation in population-scale sequenced human genomes. *PLoS Genet*. **7**, e1002144 (2011).
5. J. Yang *et al.*, Genetic variance estimation with imputed variants finds negligible missing heritability for human height and body mass index. *Nat Genet*. **47**, 1114–1120 (2015).
6. T. Gaugler *et al.*, Most genetic risk for autism resides with common variation. *Nat Genet*. **46**, 881–885 (2014).
7. C. Fuchsberger *et al.*, The genetic architecture of type 2 diabetes. *Nature*. **536**, 41–47 (2016).
8. X. Li *et al.*, The impact of rare variation on gene expression across tissues. *Nature*. **550**, 239–243 (2017).
9. A. Eyre-Walker, Evolution in health and medicine Sackler colloquium: Genetic architecture of a complex trait and its implications for fitness and genome-wide association studies. *Proc Natl Acad Sci U S A*. **107 Suppl 1**, 1752–1756 (2010).
10. L. H. Uricchio, N. A. Zaitlen, C. J. Ye, J. S. Witte, R. D. Hernandez, Selection and explosive growth alter genetic architecture and hamper the detection of causal rare variants. *Genome Res*. **26**, 863–873 (2016).
11. Y. B. Simons, M. C. Turchin, J. K. Pritchard, G. Sella, The deleterious mutation load is insensitive to recent population history. *Nat Genet*. **46**, 220–224 (2014).
12. S. Das *et al.*, Next-generation genotype imputation service and methods. *Nat Genet*. **48**, 1284–1287 (2016).

13. S. McCarthy *et al.*, A reference panel of 64,976 haplotypes for genotype imputation. *Nat Genet.* **48**, 1279–1283 (2016).
14. N. Mancuso *et al.*, The contribution of rare variation to prostate cancer heritability. *Nat Genet.* **48**, 30–35 (2016).
15. A. Schoech *et al.*, Quantification of frequency-dependent genetic architectures and action of negative selection in 25 UK Biobank traits. *BioRxiv* (2017), doi:10.1101/188086.
16. J. Zeng *et al.*, Widespread signatures of negative selection in the genetic architecture of human complex traits. *BioRxiv* (2017), doi:10.1101/145755.
17. S. Gazal *et al.*, Linkage disequilibrium-dependent architecture of human complex traits shows action of negative selection. *Nat Genet.* **49**, 1421–1427 (2017).
18. B. K. Bulik-Sullivan *et al.*, LD Score regression distinguishes confounding from polygenicity in genome-wide association studies. *Nat Genet.* **47**, 291–295 (2015).
19. A. Gusev *et al.*, Quantifying missing heritability at known GWAS loci. *PLoS Genet.* **9**, e1003993 (2013).
20. M. T. Maurano *et al.*, Systematic localization of common disease-associated variation in regulatory DNA. *Science.* **337**, 1190–1195 (2012).
21. 1000 Genomes Project Consortium *et al.*, A global reference for human genetic variation. *Nature.* **526**, 68–74 (2015).
22. T. Lappalainen *et al.*, Transcriptome and genome sequencing uncovers functional variation in humans. *Nature.* **501**, 506–511 (2013).
23. Information on materials and methods is available on Online.
24. D. Golan, E. S. Lander, S. Rosset, Measuring missing heritability: inferring the contribution of common variants. *Proc Natl Acad Sci U S A.* **111**, E5272–81 (2014).
25. J. Yang, N. A. Zaitlen, M. E. Goddard, P. M. Visscher, A. L. Price, Advantages and pitfalls in the application of mixed-model association methods. *Nat Genet.* **46**, 100–106 (2014).
26. D. Speed, G. Hemani, M. R. Johnson, D. J. Balding, Improved heritability estimation from genome-wide SNPs. *Am J Hum Genet.* **91**, 1011–1021 (2012).
27. D. Speed *et al.*, Reevaluation of SNP heritability in complex human traits. *Nat Genet.* **49**, 986–992 (2017).
28. L. Chen, P. Liu, T. C. Evans, L. M. Ettwiller, DNA damage is a major cause of sequencing errors, directly confounding variant identification. *BioRxiv* (2016), doi:10.1101/070334.
29. J. Yang *et al.*, Common SNPs explain a large proportion of the heritability for human height. *Nat Genet.* **42**, 565–569 (2010).
30. Y. B. Simons, K. Bullaughey, R. R. Hudson, G. Sella, A model for the genetic architecture of quantitative traits under stabilizing selection (2017) (available at <https://arxiv.org/abs/1704.06707>).
31. K. E. Lohmueller, The impact of population demography and selection on the genetic architecture of complex traits. *PLoS Genet.* **10**, e1004379 (2014).
32. M. Lek *et al.*, Analysis of protein-coding genetic variation in 60,706 humans. *Nature.* **536**, 285–291 (2016).

33. S. S. Shringarpure *et al.*, Using genotype array data to compare multi- and single-sample variant calls and improve variant call sets from deep coverage whole-genome sequencing data. *Bioinformatics*. **33**, 1147–1153 (2017).
34. D. Bobo, M. Lipatov, J. L. Rodriguez-Flores, A. Auton, B. M. Henn, False negatives are a significant feature of next generation sequencing callsets. *BioRxiv* (2016), doi:10.1101/066043.
35. S. P. Dickson, K. Wang, I. Krantz, H. Hakonarson, D. B. Goldstein, Rare variants create synthetic genome-wide associations. *PLoS Biol.* **8**, e1000294 (2010).
36. L. H. Uricchio, R. Torres, J. S. Witte, R. D. Hernandez, Population genetic simulations of complex phenotypes with implications for rare variant association tests. *Genet Epidemiol.* **39**, 35–44 (2015).
37. R. D. Hernandez, A flexible forward simulator for populations subject to selection and demography. *Bioinformatics*. **24**, 2786–2787 (2008).
38. S. Tavaré, D. J. Balding, R. C. Griffiths, P. Donnelly, Inferring coalescence times from DNA sequence data. *Genetics*. **145**, 505–518 (1997).
39. J. A. Tennessen *et al.*, Evolution and functional impact of rare coding variation from deep sequencing of human exomes. *Science*. **337**, 64–69 (2012).
40. D. G. Torgerson *et al.*, Evolutionary processes acting on candidate cis-regulatory regions in humans inferred from patterns of polymorphism and divergence. *PLoS Genet.* **5**, e1000592 (2009).
41. A. R. Boyko *et al.*, Assessing the evolutionary impact of amino acid mutations in the human genome. *PLoS Genet.* **4**, e1000083 (2008).
42. L. H. Uricchio, H. C. Kitano, A. Gusev, N. A. Zaitlen, Evidence for evolutionary shifts in the fitness landscape of human complex traits. *BioRxiv* (2017), doi:10.1101/173815.
43. A. L. Price *et al.*, Single-tissue and cross-tissue heritability of gene expression via identity-by-descent in related or unrelated individuals. *PLoS Genet.* **7**, e1001317 (2011).
44. E. Grundberg *et al.*, Mapping cis- and trans-regulatory effects across multiple tissues in twins. *Nat Genet.* **44**, 1084–1089 (2012).
45. J. E. Powell *et al.*, Genetic control of gene expression in whole blood and lymphoblastoid cell lines is largely independent. *Genome Res.* **22**, 456–466 (2012).
46. N. R. Wray, S. M. Purcell, P. M. Visscher, Synthetic associations created by rare variants do not explain most GWAS results. *PLoS Biol.* **9**, e1000579 (2011).
47. E. A. Boyle, Y. I. Li, J. K. Pritchard, An expanded view of complex traits: from polygenic to omnigenic. *Cell*. **169**, 1177–1186 (2017).

**Acknowledgments:** We thank Hyun Min Kang and Adam Auton for discussions about possible confounders that improved our analysis, Raul Torres for assistance with data analysis, and Aria Hernandez for suggestions on figure colors. Research reported in this publication was supported by National Human Genome Research Institute of the National Institutes of Health under award number R01HG007644 to RDH and K25HL121295. LHU was supported by IRACDA NIGMS grant K12GM088033, KH was supported by a Gilliam Fellowship, and AD was supported by U01HG009080 and R01HG006399.
